# Supplementary material for: Mechanisms of Ardisia japonica in the Treatment of Hepatic Injury in Rats Based on LC-MS Metabolomics
Source: MDPI journal article supplement (doi:10.3390/metabo12100981), 2022-10-17
Supplement: s1 [file s1]

# Mechanisms of *Ardisia japonica* in the Treatment of Hepatic Injury in Rats Based on LC-MS Metabolomics

Tian Fu <sup>1,2,†</sup>, Shuiling Qin <sup>1,2,†</sup>, Huajuan He <sup>1</sup>, Kefeng Zhang <sup>1,2</sup>, Wei Zhang <sup>1</sup>, Xin Tang <sup>3,\*</sup> and Wei Wu <sup>1,2,\*</sup>

<sup>1</sup> School of Pharmacy, Guilin Medical University, Guilin 541199, China

<sup>2</sup> Pharmacology Laboratory of Prevention and Treatment of High Incidence of Disease, Guilin Medical University, Guilin 541199, China

<sup>3</sup> School of Public Health, Guilin Medical University, Guilin 541199, China

\* Correspondence: tangxin\_glm@126.com (X.T.); wuwei@glmc.edu.cn (W.W.)

† These authors contributed equally.

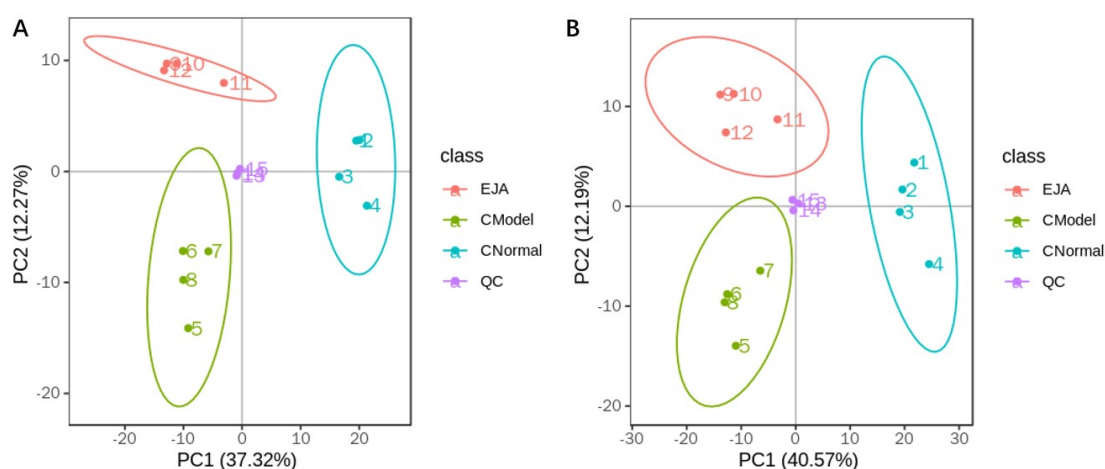

**Supplementary materials Figure S1.** PCA analysis of the total sample. (A) PCA plot of total samples in positive ion mode; (B) PCA plot of total samples in negative ion mode (Note: Scattered dots in different colors indicate samples of different experimental groups, and ellipses are 95% confidence intervals).

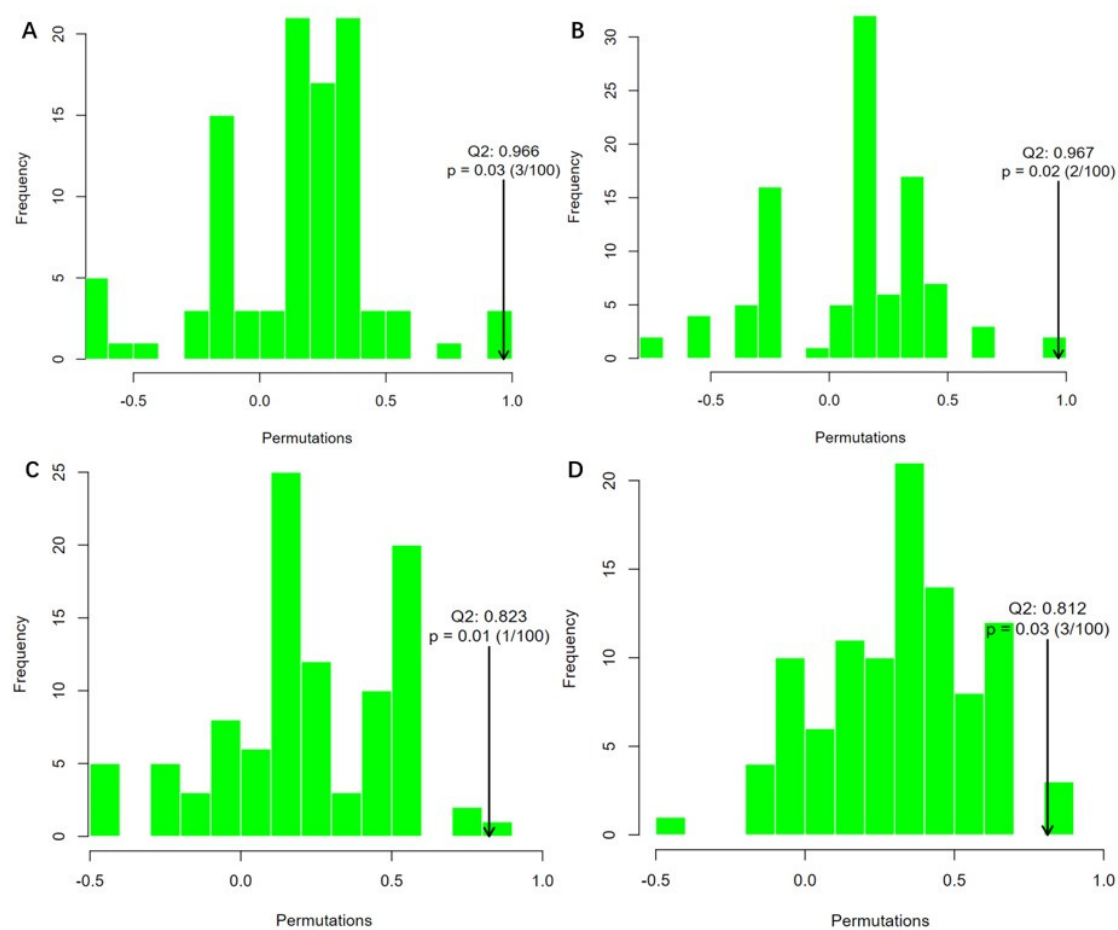

**Supplementary materials Figure S2.** Distribution of test statistic (Q2) and p-value of OPLS-DA permutation tests. Permutation test between normal and model groups in positive ion mode (A) and negative ion mode (B); Permutation test between model and treatment groups in positive ion mode (C) and negative ion mode (D). (Note: The distribution plots are the permutation random distribution of Q2, and the arrows point to the actual observed model Q2).

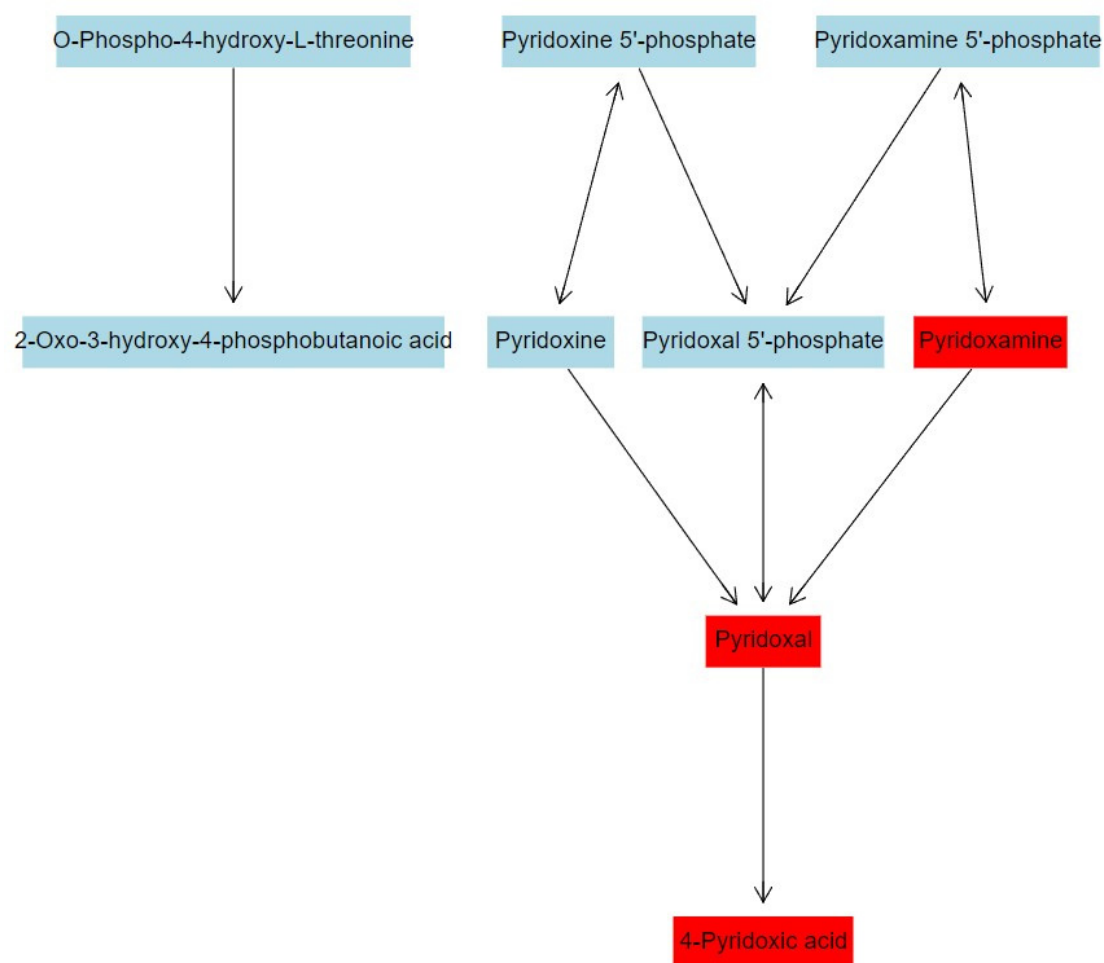

**Supplementary materials Figure S3.** Analysis of vitamin B6 metabolic pathway. (Note: Each arrow points from the substrate to the product, and the bidirectional arrows indicate that the reaction is reversible. Metabolites in red are those that differ significantly between groups).

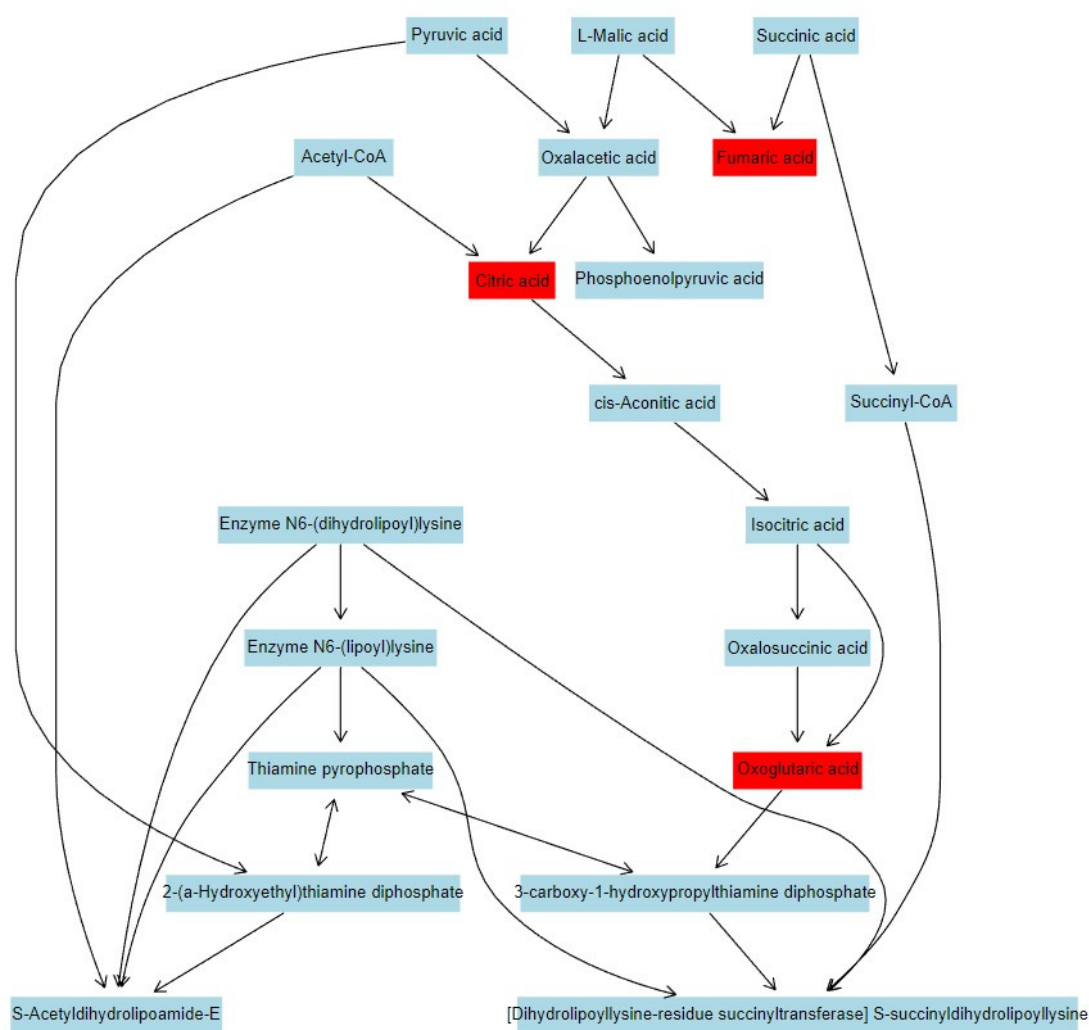

**Supplementary materials Figure S4.** Analysis of TCA circulating metabolic pathways. (Note: Each arrow points from the substrate to the product, and the bidirectional arrows indicate that the reaction is reversible. Metabolites in red are those that differ significantly between groups).
